# Supplementary material
Source: Springer Nature journal article supplement (https://www.springermedizin.de/resource/supplementary/12891_2010_1129_MOESM1_ESM.pdf/9507200)

### Repositioning

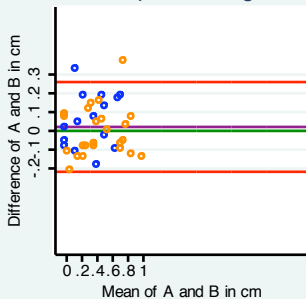

### Sitting Forward Lean

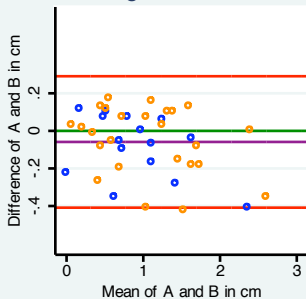

### Sitting Knee Extension

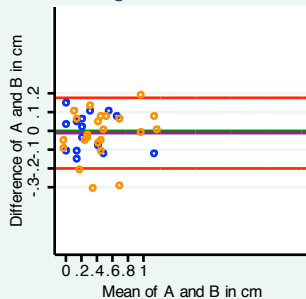

### Bent Knee Fall Out

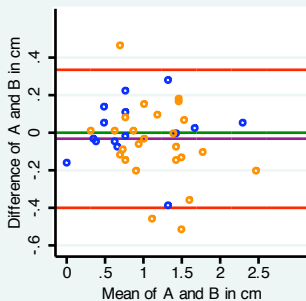

### Leg Lowering

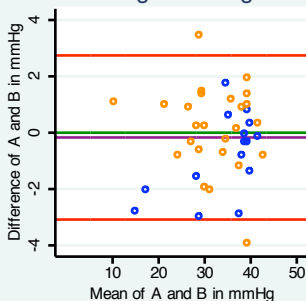

Supplement: MOESM1 [file 9507200]
